# Supplementary material
Source: PubMed Central journal article supplement (PMC2154416)

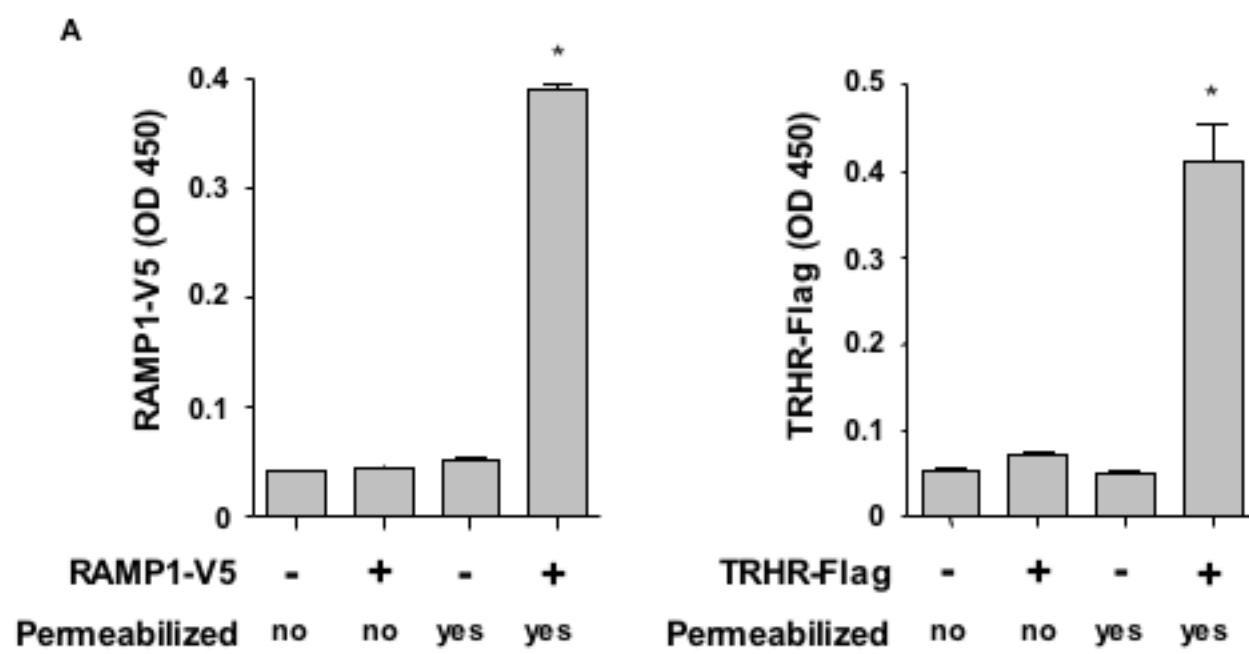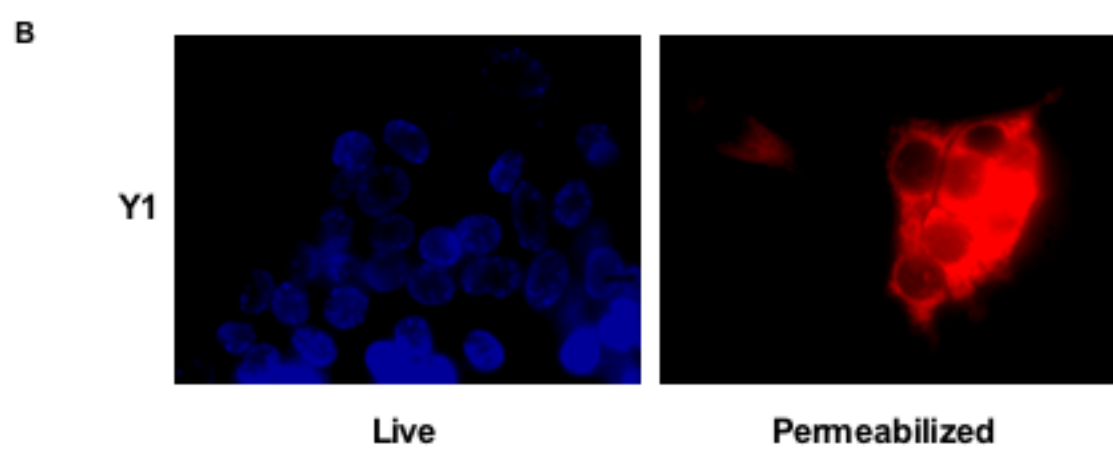

Supplement: supp_0708916105_08916Fig6.pdf [file supp_0708916105_08916Fig6.pdf]

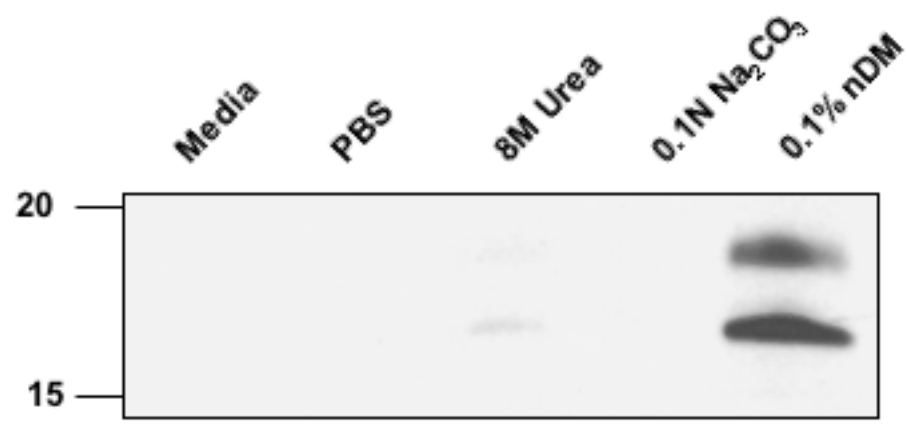

MRAP-V5

Supplement: supp_0708916105_08916Fig7.pdf [file supp_0708916105_08916Fig7.pdf]
